# Supplementary material for: Type I interferon signature and cycling lymphocytes in macrophage activation syndrome
Source: J Clin Invest. 2023 Nov 15;133(22):e165616. doi: 10.1172/JCI165616 (PMC10645381; doi:10.1172/JCI165616)
Supplement: Supplemental data [file jci-133-165616-s025.pdf]

# Type I interferon signature and cycling lymphocytes in macrophage activation syndrome

Huang Z, Brodeur K, Chen L, Du Y et al.

## Supplemental Materials

Supplemental Table 1 – 4

Supplemental Figures 1 – 8

**Supplemental Table 1. Demographics, laboratory data and medication usage in patients with SD with or without MAS.**

|                                 | <u>SD without MAS**</u> | <u>SD with MAS***</u>  |
|---------------------------------|-------------------------|------------------------|
| <u>Demographics</u>             |                         |                        |
| Total # of subjects             | 10                      | 10                     |
| Age (year)                      | 5.0 ± 4.1               | 8.7 ± 7.6              |
| Female                          | 50%                     | 50%                    |
| Active disease                  | 100%                    | 100%                   |
| <u>Laboratory studies*</u>      |                         |                        |
| WBC (x10 <sup>3</sup> /mL)      | 11.3 [8.2, 23.5]        | 8.9 [4.9, 12.6]        |
| Hemoglobin (g/dL)               | 10.7 [10.3, 11.1]       | 9.5 [8.3, 11.2]        |
| Platelet (x10 <sup>3</sup> /mL) | 389 [346, 624]          | 205 [163, 330]         |
| CRP (mg/dL)                     | 4.6 [0.5, 12.9]         | 5.8 [1.5, 12.1]        |
| Ferritin (ng/mL)                | 416 [86, 1066]          | 2894 [2221, 5906]      |
| AST (U/L)                       | 31 [21, 35]             | 58 [50, 110]           |
| Triglyceride (mg/dL)            | 135 [106, 160]          | 220 [188, 289]         |
| Fibrinogen (mg/dL)              | 693 [274, 750]          | 340 [203, 406]         |
| LDH (U/L)                       | 312 [254, 483]          | 652 [577, 774]         |
| IL-18 (pg/mL)                   | 17220 [7488, 36987]     | 101546 [71741, 200195] |
| CXCL9 (pg/mL)                   | 366 [330, 578]          | 3889 [1501, 10053]     |
| <u>Medications</u>              |                         |                        |
| Anakinra                        | 20%                     | 30%                    |
| Canakinumab                     | 0%                      | 0%                     |
| Tocilizumab                     | 0%                      | 0%                     |
| Tofacitinib                     | 0%                      | 10%                    |
| Corticosteroids                 | 30%                     | 30%                    |
| Methotrexate                    | 10%                     | 10%                    |

\* Values represent median and interquartile range

\*\* All 10 patients in the active SD without MAS group were analyzed by bulk RNA-seq; 8/10 patients were analyzed by single cell RNA-seq. Two patients with inactive SD were also incorporated in SD without MAS group for single cell RNA-seq analysis.

\*\*\* All 10 patients in the MAS group were analyzed by bulk RNA-seq; 9/10 were analyzed by single cell RNA-seq.

**Supplemental Table 2. Demographics of healthy controls and patient groups for flow cytometry studies.**

|                              |          | <u>n</u> | <u>Age (year)</u> | <u>Female</u> | <u>Active disease</u> |
|------------------------------|----------|----------|-------------------|---------------|-----------------------|
| Healthy Controls             | Children | 11       | 9.5 ± 6.3         | 45%           | -                     |
|                              | Adults   | 9        | 32.3 ± 6.6        | 67%           | -                     |
| inactive sJIA                |          | 11       | 9.8 ± 6.4         | 55%           | 0%                    |
| active sJIA                  |          | 11       | 11.1 ± 5.3        | 55%           | 100%                  |
| non-sJIA <sup>a</sup>        |          | 18       | 12.1 ± 6.2        | 72%           | 72%                   |
| MAS                          |          | 10       | 9.7 ± 7.9         | 50%           | 100%                  |
| Other MAS <sup>b</sup>       |          | 5        | 7.4 ± 7.6         | 40%           | 100%                  |
| SLE                          |          | 9        | 14.7 ± 2.2        | 78%           | 78%                   |
| JDM                          |          | 11       | 12.2 ± 5.3        | 73%           | 66%                   |
| MIS-C <sup>c</sup>           |          | 20       | 8.2 ± 3.3         | 60%           | 100%                  |
| KD <sup>d</sup>              |          | 10       | 2.5 ± 1.6         | 50%           | 100%                  |
| Viral infection <sup>e</sup> |          | 18       | 2.2 ± 2.6         | 44%           | 100%                  |

a. The non-systemic juvenile idiopathic arthritis (JIA) group includes patients with oligoarticular JIA, polyarticular JIA and psoriatic arthritis and enthesitis-related arthritis.

b. The other MAS group includes 3 patients with infection-associated MAS, 1 patient with MAS secondary to a described gain-of-function CDC42 variant, and 2 patients with MAS of unclear etiology.

c. Samples for patients with MIS-C were collected before any immunosuppressive therapy (55%), within 48 hours of treatment initiation (35%), or > 48 hours after treatment initiation (10%).

d. The Kawasaki disease group includes 7 patients with complete KD and 3 patients with incomplete KD. One patient had clinical features of Kawasaki shock syndrome.

e. The viral infection group were confirmed to have SARS-COV-2 (n=6), rhinovirus (n=6), adenovirus (n=5), parainfluenza virus (n=5), respiratory syncytial virus (n=1), or human metapneumovirus (n=1). Six individuals tested positive for 2 viruses.

**Supplemental Table 3. List of flow cytometry antibodies and sources.**

| Target antigen                   | Clone          | Conjugate            | Cat no. | Lot no. | Source    | Dilution                            |
|----------------------------------|----------------|----------------------|---------|---------|-----------|-------------------------------------|
| CD3                              | OKT3           | PE                   | 317308  | B349598 | Biolegend | 1:400                               |
| CD4                              | OKT4           | FITC                 | 317408  | B325364 | Biolegend | 1:400                               |
| CD8                              | SK1            | PE-Cy7               | 344750  | B337146 | Biolegend | 1:800                               |
| CD56                             | 5.1H11         | Pacific Blue         | 362520  | B323034 | Biolegend | 1:200                               |
| CD38                             | HB-7           | Brilliant Violet 510 | 356612  | B346260 | Biolegend | 1:200                               |
| HLA-DR                           | L243           | APC                  | 307610  | B278650 | Biolegend | 1:200                               |
| CD107a                           | H4A3           | PE                   | 328607  | B283847 | Biolegend | 1:200                               |
| Perforin                         | B-D48          | FITC                 | 353309  | B352897 | Biolegend | 1:200                               |
| Granzyme A                       | CB9            | Pacific Blue         | 507208  | B268999 | Biolegend | 1:200                               |
| Granzyme B                       | QA16A02        | FITC                 | 372205  | B274305 | Biolegend | 1:200                               |
| CD122                            | TU27           | APC                  | 339007  | B280345 | Biolegend | 1:200                               |
| CD132                            | QA17A55        | PE                   | 314603  | B328365 | Biolegend | 1:200                               |
| CD215                            | JM7A4          | APC                  | 330209  | B343828 | Biolegend | 1:200                               |
| Ki-67                            | Ki-67          | Pacific Blue         | 350511  | B279318 | Biolegend | 1:200                               |
| TotalSeq<br>B0251<br>Hashtag 1   | LNH-94;<br>2M2 | RNAseq Hashtag       | 394631  | 394631  | Biolegend | 1 µg per<br>2X10 <sup>6</sup> cells |
| TotalSeq<br>B0252<br>Hashtag 2   | LNH-94;<br>2M2 | RNAseq Hashtag       | 394633  | 394633  | Biolegend | 1 µg per<br>2X10 <sup>6</sup> cells |
| TotalSeq -<br>B0253<br>Hashtag 3 | LNH-94;<br>2M2 | RNAseqHashtag        | 394635  | 394635  | Biolegend | 1 µg per<br>2X10 <sup>6</sup> cells |

**Supplemental Table 4. List of metal isotope-conjugated antibodies for mass cytometry.\***

| <b><u>Marker</u></b> | <b><u>Clone</u></b> | <b><u>Isotope</u></b> | <b><u>Marker</u></b> | <b><u>Clone</u></b> | <b><u>Isotope</u></b> |
|----------------------|---------------------|-----------------------|----------------------|---------------------|-----------------------|
| CD45                 | HI30                | 89Y                   | CD39*                | A1                  | 158Gd                 |
| CD172ab              | SE5A5               | 111Cd                 | FPR1                 | 350418              | 160Gd                 |
| CD8a*                | RPA T8              | 112Cd                 | CD303                | REA693              | 161Dy                 |
| CD20*                | 2H7                 | 113Cd                 | MARCO                | Polyclonal          | 162Dy                 |
| CD4*                 | RPA T4              | 114Cd                 | CCR2                 | K036C2              | 163Dy                 |
| CD3*                 | UCHT1               | 115In                 | CD141                | M80                 | 164Dy                 |
| CD56*                | NCAM16.2            | 116Cd                 | CD38*                | HIT2                | 165Ho                 |
| Siglec-6             | 767329              | 141Pr                 | CLEC9A               | REA976              | 166Er                 |
| TLR4                 | 610015              | 142Nd                 | CD84                 | CD84.1.21           | 167Er                 |
| CD36                 | 5-271               | 143Nd                 | HO-1                 | HO-1-1              | 168Er                 |
| CD64                 | 10.1                | 144Nd                 | CX3CR1*              | REA385              | 169Tm                 |
| CD163                | REA812              | 145Nd                 | PD-L1                | 29E.2A3             | 170Er                 |
| CD74                 | LN2                 | 146Nd                 | CD206                | 19.2                | 171Yb                 |
| CD86                 | IT2.2               | 147Sm                 | CD170                | 1A5                 | 173Yb                 |
| CD1c                 | L161                | 148Nd                 | Ki67*                | 8D5                 | 174Yb                 |
| CD1d                 | 51.1                | 149Sm                 | CD85i                | 586326              | 175Lu                 |
| CD11c                | Bu15                | 150Nd                 | CD68                 | Y1/82A              | 176Yb                 |
| CD123                | 6H6                 | 151Eu                 | CD180                | MHR73-11            | 194Pt                 |
| CD14*                | M5E2                | 152Sm                 | HLA-DR*              | L243                | 195Pt                 |
| CD85d                | 42D1                | 153Eu                 | FOLR2                | 94b/FOLR2           | 196Pt                 |
| Siglec-1             | 7-239               | 155Gd                 | CD115                | 61708               | 198Pt                 |
| XCR1                 | 1097A               | 156Gd                 | CD11b*               | ICRF44              | 209Bi                 |
| CD16*                | 3G8                 | 157Gd                 |                      |                     |                       |

\* all antibodies were prepared by the Longwood Medical Area CytoF Antibody Resource Core

\* markers included in the UMAP analysis of T cell and NK cell subsets

A

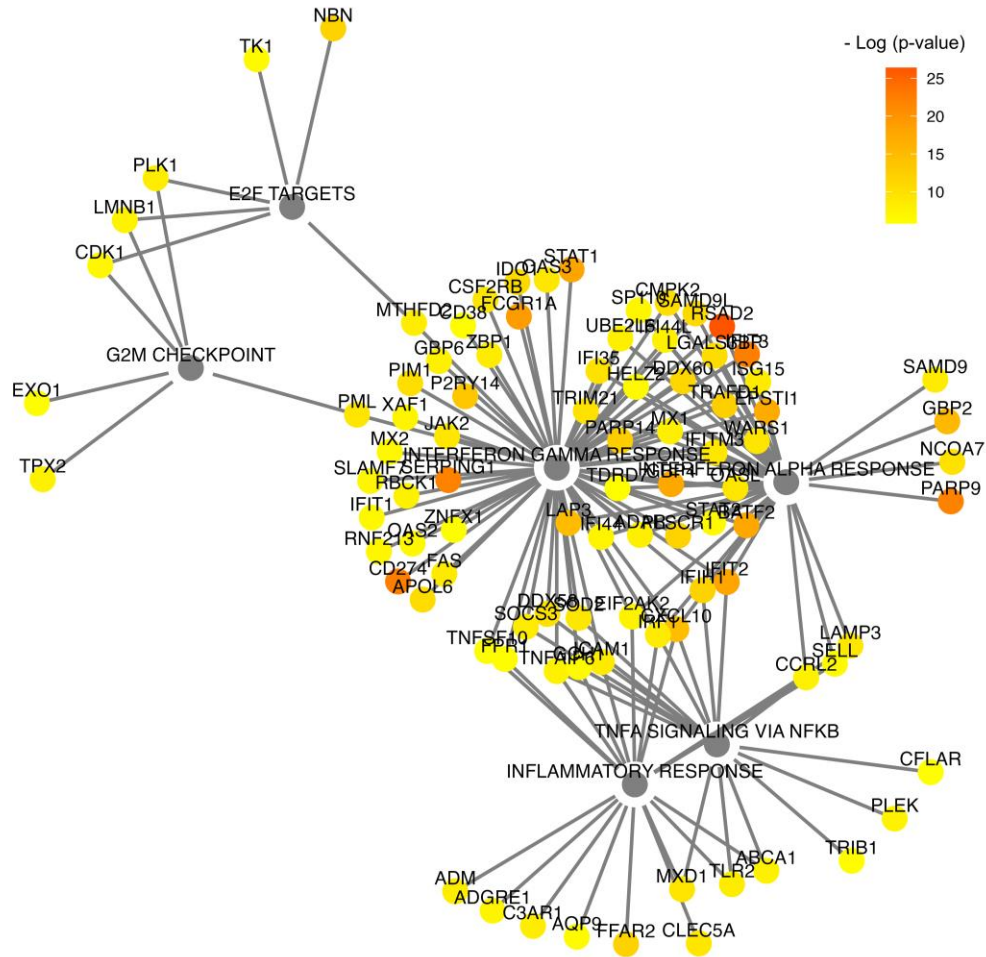

B

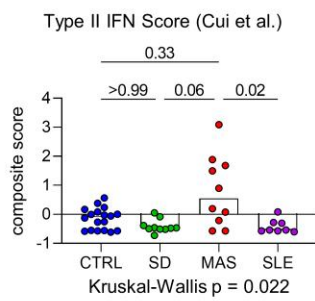

C

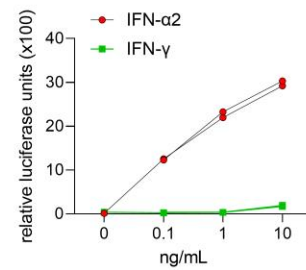

D

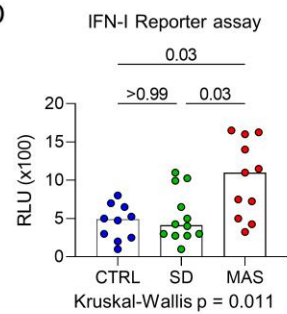

**Supplemental Figure 1. Presence of IFN-I and IFN- $\gamma$  gene signatures in PBMC from patients with SD-associated MAS.** A) Cytoscape network analysis of the top 200 genes enriched in the MAS group (n=10) compared to healthy controls (n=18) using the Hallmark gene set collection. B) Comparison of composite gene set score derived from a published IFN- $\gamma$  signature gene set. C) Quantification of luciferase activity in 293T IFN-I reporter cells stimulated with the indicated concentrations of IFN- $\alpha$ 2 or IFN- $\gamma$  (n = 2 for each concentration). D) Quantification of luciferase activity in 293T-ISRE-luciferase reporter cells cultured with 20% plasma from healthy controls (n=10) and patients with SD with (n=11) or without MAS (n=17). Statistical analysis: Bars in panels B and D represent the median. Kruskal-Wallis test was used for comparison of multiple groups and Dunn's correction was applied for the indicated comparisons.

Supplemental Figure 2

A

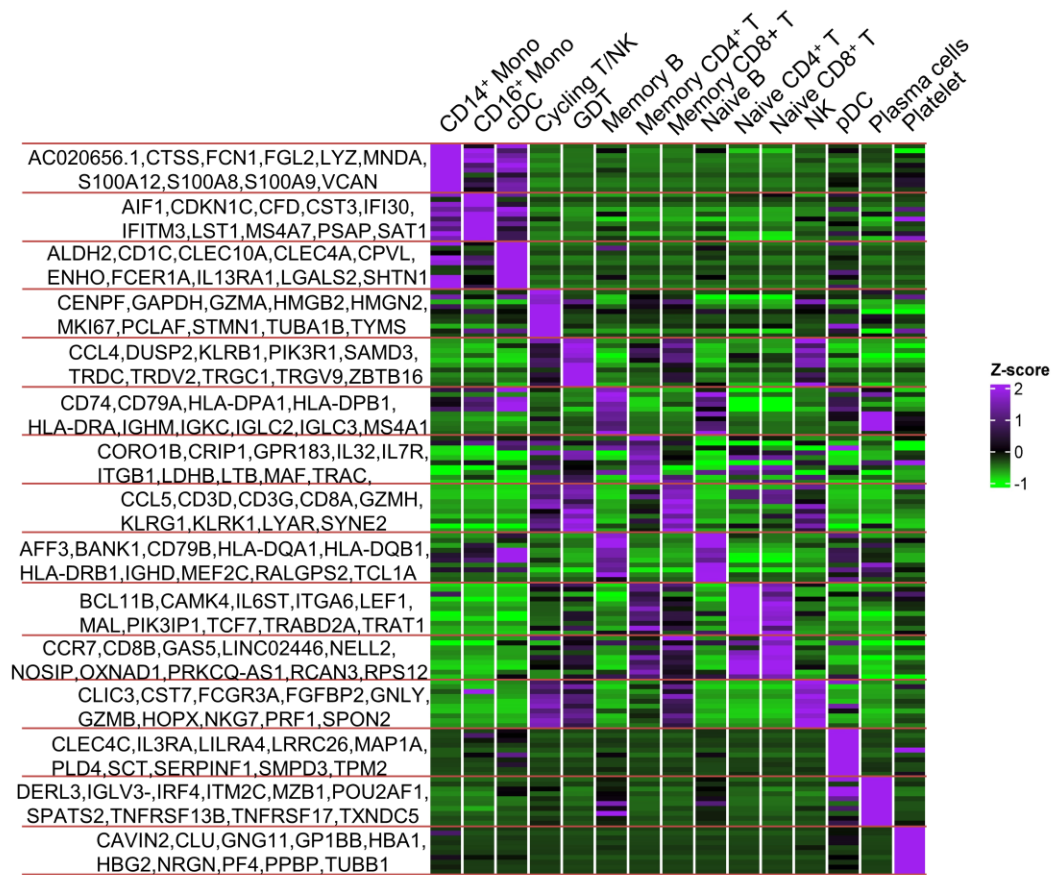

B

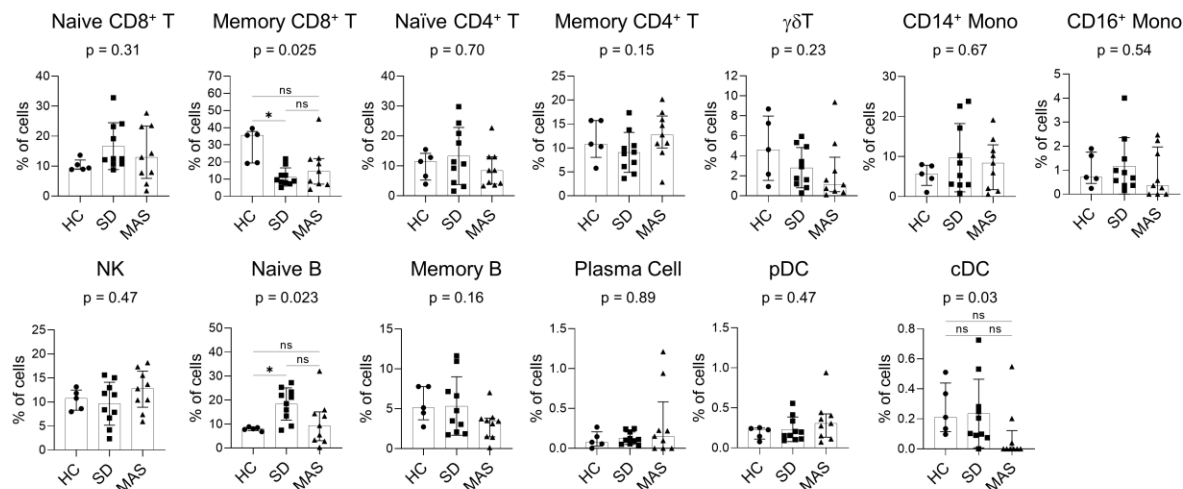

**Supplemental Figure 2. scRNA-seq of PBMC from healthy controls and patients with SD with or without MAS.** A) Heatmap display of top 10 differentially expressed genes unique to each cell subset. B) Quantification and comparison of cell subsets in healthy controls (n=5) and patients with SD without MAS (n=10) or with MAS (n=9). Statistical analysis: Bars represent the median and error bars indicate interquartile range. Kruskal-Wallis test was used for comparison of multiple groups and Dunn's correction was applied for the indicated comparisons.

Supplemental Figure 3.

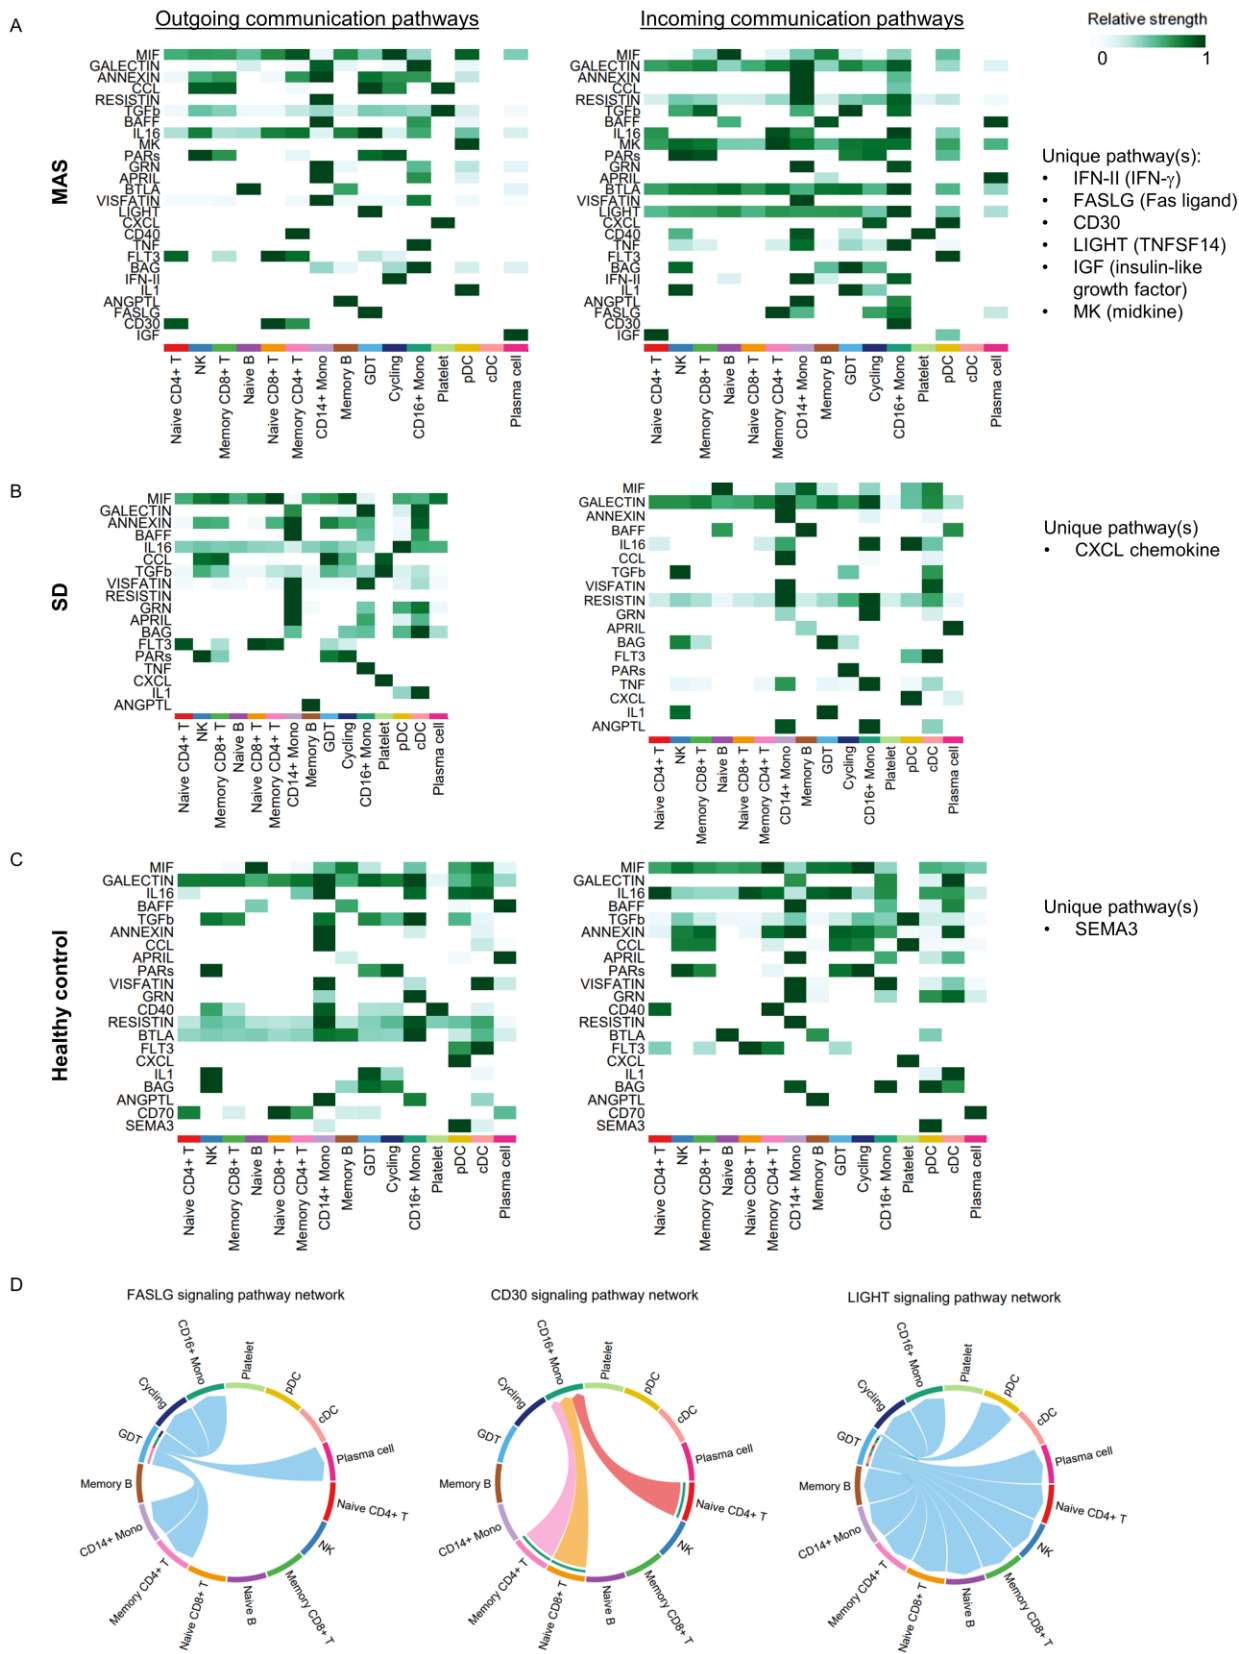

**Supplemental Figure 3. Analysis of cell-cell interactions from scRNA-seq of SD and MAS.**

A-C) heatmap display of outgoing and incoming signal pathways in PBMC cell subsets based on CellChat analysis of scRNA-seq data from healthy controls (panel A), patients with active SD without MAS (panel B), and active SD with MAS (panel C). Pathway(s) unique to each group are displayed on the right. D) Chord diagrams illustrating the Fas ligand, CD30 and LIGHT pathway interactions in PBMC subsets from patients with MAS.

Supplemental Figure 4.

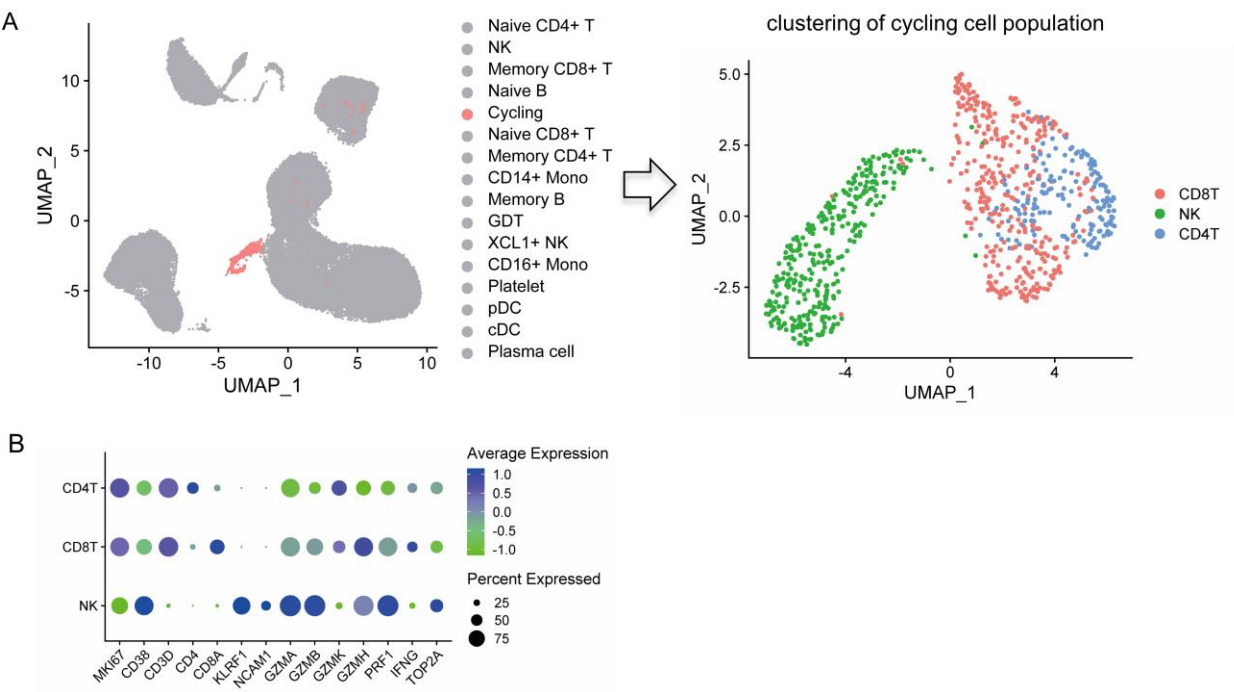

**Supplemental Figure 4. scRNA-seq of cycling lymphocyte subsets.** A) UMAP display of cell subsets within the cycling lymphocyte population. B) Cluster plot of lineage-defining markers for cycling CD4<sup>+</sup> T cell, CD8<sup>+</sup> T cell and NK cell subsets.

Supplemental Figure 5.

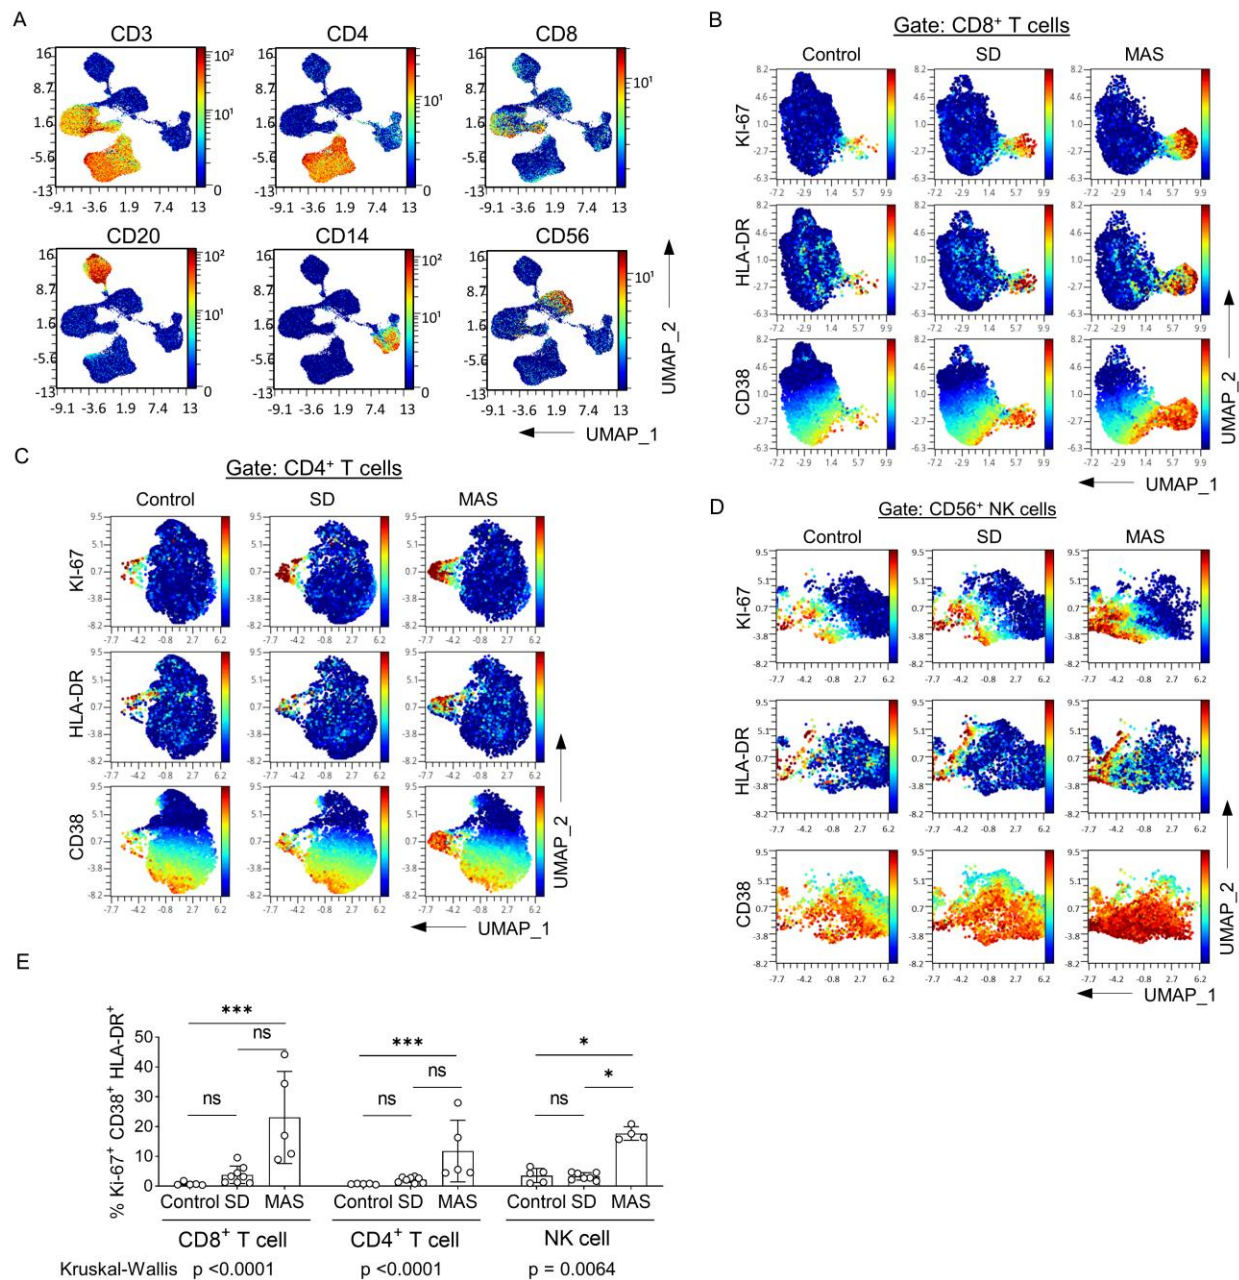

**Supplemental Figure 5. Identification of CD38<sup>+</sup>HLA-DR<sup>+</sup> cycling lymphocytes by mass cytometry.** A) UMAP display of PBMC concatenated from healthy controls (n=5), patients with SD without MAS (n=7) and with MAS (n=4). Color denotes the expression of the indicated lineage markers. UMAP display of B) CD8<sup>+</sup> T cells, C) CD4<sup>+</sup> T cells, and D) NK cells comparing PBMC concatenated from healthy controls and patient groups. Color denotes the expression of indicated markers including MKI67, CD38 and HLA-DR. E) Quantification of MKI67<sup>+</sup>CD38<sup>+</sup>HLA-DR<sup>+</sup> cells within T cell and NK cell populations and comparison among healthy controls, patients with SD without MAS, and patients with MAS. Statistical analysis: Bars represent the median and error bars indicate interquartile range in panel E. Kruskal-Wallis test was used for comparison of multiple groups and Dunn's correction was applied for the indicated comparisons.

Supplemental Figure 6.

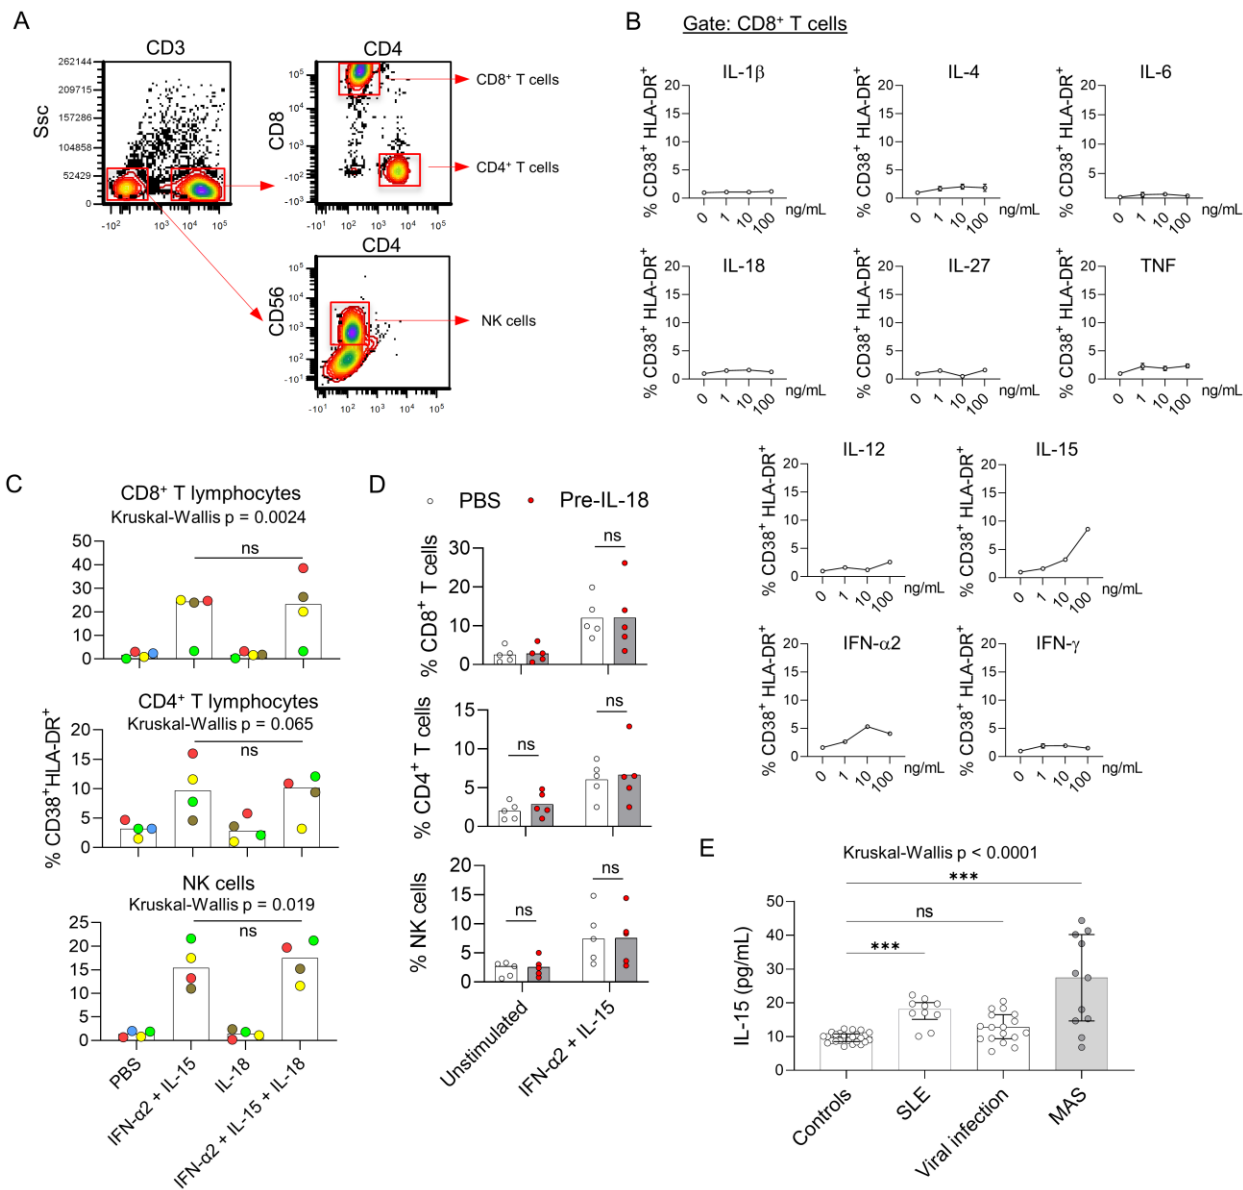

**Supplemental Figure 6. Analysis of CD38<sup>+</sup>HLA-DR<sup>+</sup> lymphocytes and induction by cytokines.** A) Gating strategy to identify CD4<sup>+</sup> T cells, CD8<sup>+</sup> T cells and NK cells in PBMCs. B) Induction of CD38<sup>+</sup>HLA-DR<sup>+</sup>CD8<sup>+</sup> T cells by coculturing PBMC from a healthy donor with various cytokines at the indicated concentrations for 2 days. C) Quantification of CD38<sup>+</sup>HLA-DR<sup>+</sup> lymphocyte subsets induced by coculturing PBMC from healthy controls (n=5) with IL-15 (10 ng/mL), IFN- $\alpha$ 2 (10 ng/mL), and/or IL-18 (100 ng/mL) for 2 days. Each color in panel B represents a unique healthy donor (n=4). Results for each donor represent the average of duplicate samples. D) Quantification of CD38<sup>+</sup>HLA-DR<sup>+</sup> lymphocyte subsets induced by coculturing PBMC from healthy controls (n=4-5) with IL-15 (10 ng/mL) and IFN- $\alpha$ 2 (10 ng/mL), with or without IL-18 pre-treatment (100 ng/mL; for 24 hours). Cells were analyzed 48 hours after IFN- $\alpha$ 2 and IL-15 stimulation. E) Plasma IL-15 levels in healthy controls (n=25), patients with SLE (n=11), acute viral infection (n=17), or active SD with MAS (n=11; previously shown in Figure 6C) as measured by proximity extension assay. Statistical analysis: Bars represent the median and error bars indicate interquartile range in panels C, D and E. Kruskal-Wallis test was used for comparison of multiple groups and Dunn's correction was applied for the indicated comparisons (panels C and E). Mann-Whitney U test was applied for panel D. \* p<0.05, \*\* p<0.01, \*\*\* p<0.001.

Supplemental Figure 7.

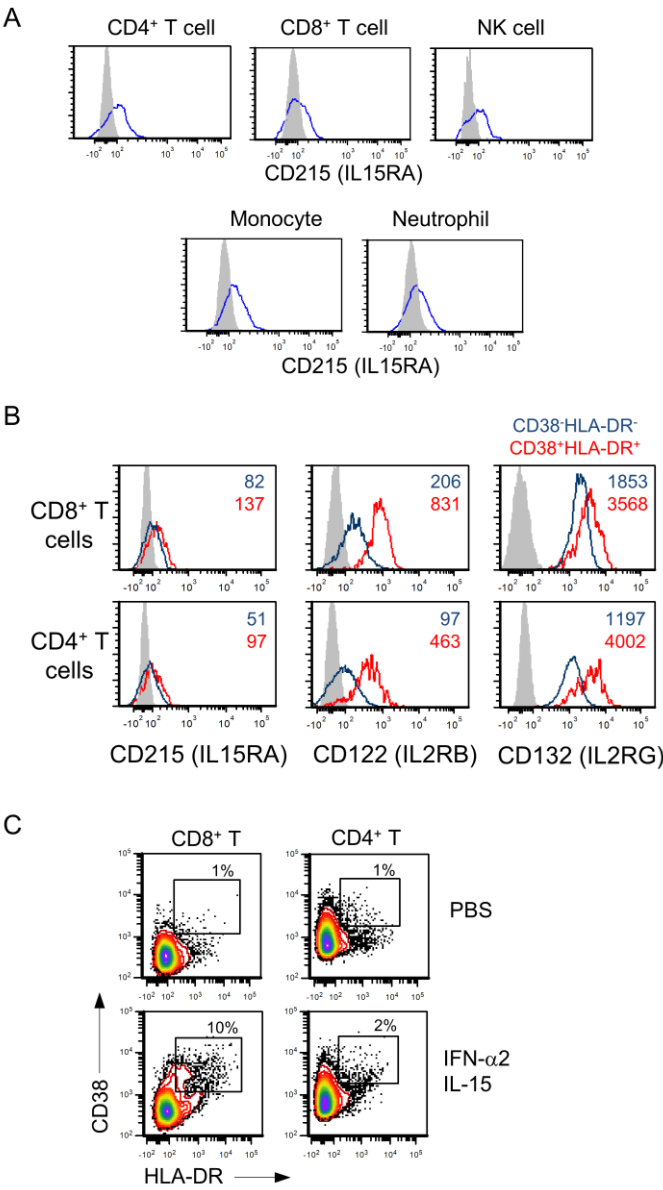

**Supplemental Figure 7. Expression of IL-15 receptor components in CD38<sup>+</sup>HLA-DR<sup>+</sup>**

**lymphocytes.** A) Representative histogram illustrating IL-15RA (CD215), IL2RB (CD122) and IL2RG (CD132) expression by CD38<sup>+</sup>HLA-DR<sup>+</sup> and CD38<sup>+</sup>HLA-DR<sup>-</sup> T lymphocytes within the CD8<sup>+</sup>T cell or CD4<sup>+</sup> T cell population from a patient with SD-associated MAS. Gray shade represents isotype controls and mean fluorescence intensity is indicated. Results are representative of data from 2 patients with SD-associated MAS. B) Representative histogram illustrating IL-15RA (CD215) expression by PBMC subsets from a healthy donor. Gray shade represents isotype controls. Results are representative of data from 4 healthy controls. C) Representative flow cytometry plot of CD38<sup>+</sup>HLA-DR<sup>+</sup> T lymphocyte subsets induced by coculturing purified T lymphocytes from a healthy control with PBS, IL-15 (10 ng/mL), and/or IFN- $\alpha$ 2 (10 ng/mL) for 2 days. Results are representative of data from 3 healthy controls.

Supplemental Figure 8.

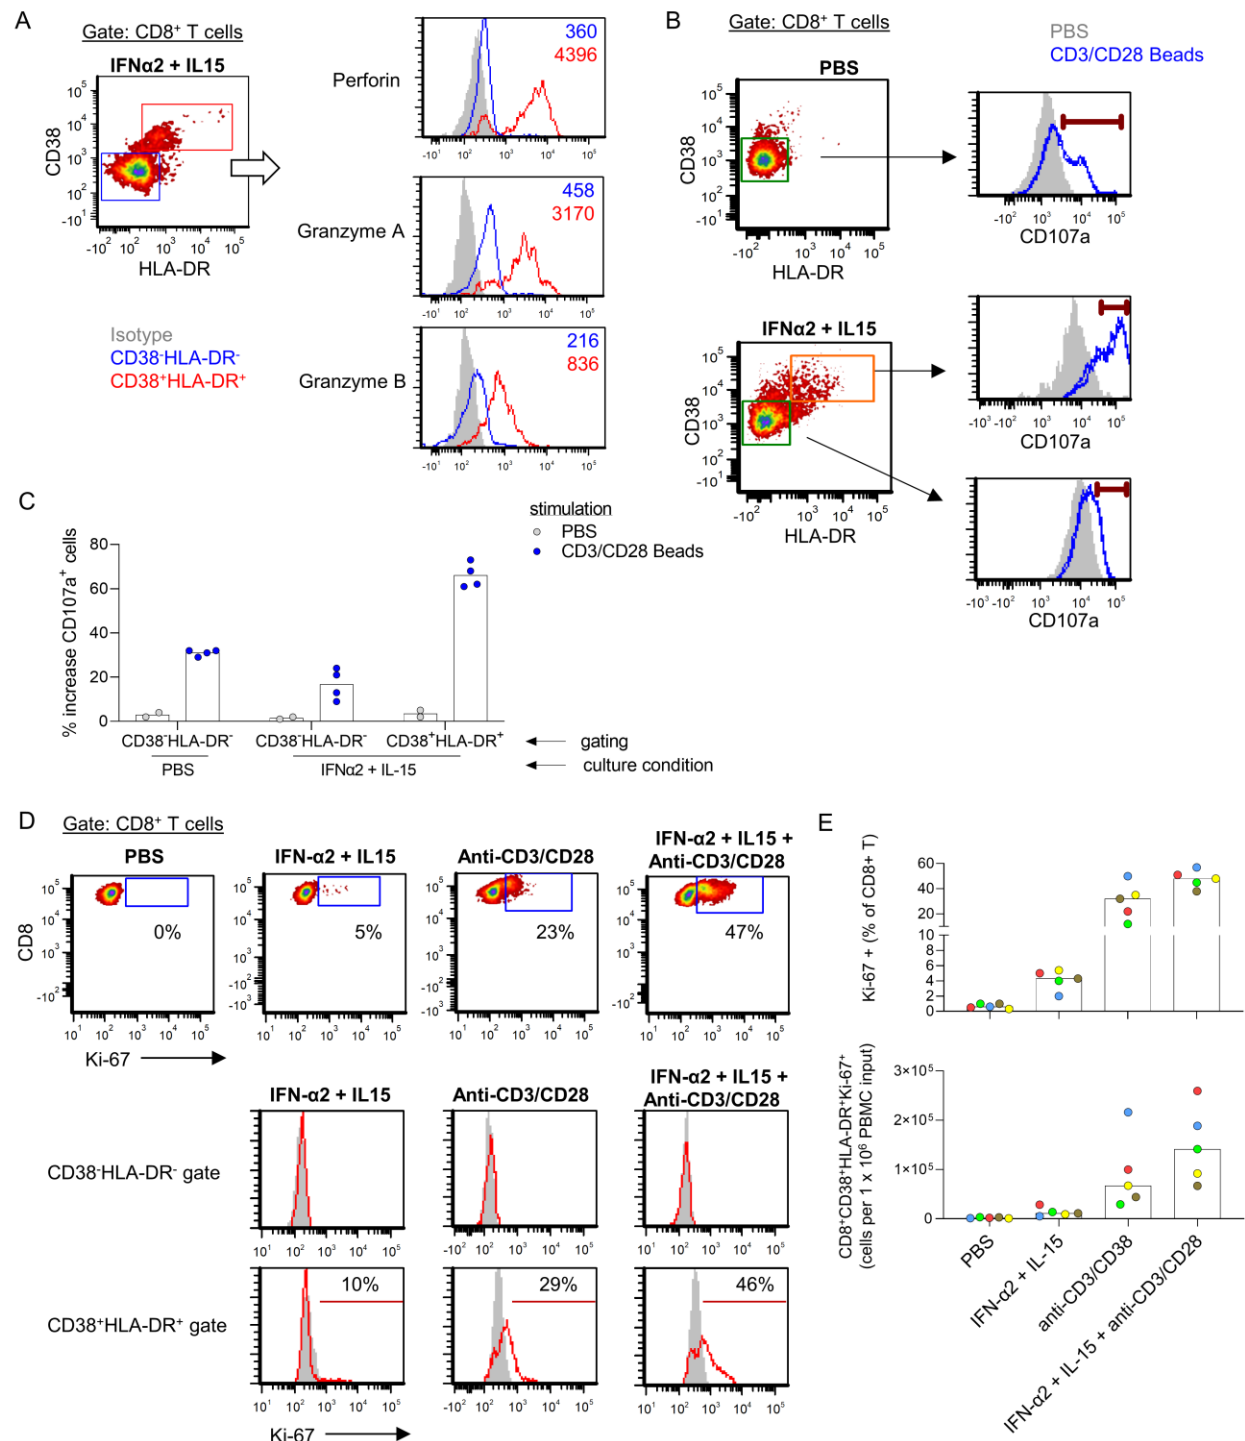

**Supplemental Figure 8. Functional characterization of CD38<sup>+</sup>HLA-DR<sup>+</sup> lymphocytes.** A) Quantification of perforin, granzyme A and granzyme B expression in CD38<sup>+</sup>HLA-DR<sup>+</sup>CD8<sup>+</sup> (red gate) and CD38<sup>+</sup>HLA-DR<sup>+</sup>CD8<sup>+</sup> T cells (blue gate) by Intracellular staining. PBMC were cocultured with IFN- $\alpha$ 2 + IL-15 for 2 days. Gray shade indicates isotype staining. B) Flow cytometry plots and C) quantification of surface CD107a expression in CD38<sup>+</sup>HLA-DR<sup>+</sup>CD8<sup>+</sup> and CD38<sup>+</sup>HLA-DR<sup>+</sup>CD8<sup>+</sup> T cells at baseline (gray shade) and 3 hours after stimulation with CD3/CD28 beads (duplicate samples represented by blue lines). PBMC were cultured with PBS (left panel) or IFN- $\alpha$ 2 + IL-15 (right panel) for 2 days. Data in panels A and B are representative of 2-3 independent experiments. Bars in panel C represent the mean. D) Flow cytometry plots of intracellular KI-67 expression in CD8<sup>+</sup>T cells (upper panel) and comparison of KI-67 in CD38<sup>+</sup>HLA-DR<sup>+</sup>CD8<sup>+</sup> and CD38<sup>+</sup>HLA-DR<sup>+</sup>CD8<sup>+</sup> T cells (lower panel) 6 days after stimulation with IFN- $\alpha$ 2 + IL-15 and/or anti-CD3/CD28 beads. E) Relative quantification of Ki-67<sup>+</sup> cells (as % of CD8<sup>+</sup>T cells) and absolute quantification (as number of CD38<sup>+</sup>HLA-DR<sup>+</sup>CD8<sup>+</sup> Ki-67<sup>+</sup> cells per 1x10<sup>6</sup> PBMC input) 6 days after stimulation with IFN- $\alpha$ 2 + IL-15 and/or anti-CD3/CD28 beads. Each color in panel E represents a unique healthy donor (n = 5). Results for each donor represent the average of duplicate samples.
